# Supplementary material for: Telomere Length Differently Associated to Obesity and Hyperandrogenism in Women With Polycystic Ovary Syndrome
Source: PubMed Central journal article supplement (PMC8162376; doi:10.3389/fendo.2021.604215), 2021-05-14
Supplement: DataSheet_1.pdf [file DataSheet_1.pdf]

**Supplementary Table1.** Clinical and biochemical parameters of the control and PCOS groups divided by androgenic condition.

| Features                 | Control<br>(n=64)   | NHA-PCOS<br>(n=15)      | HA- PCOS<br>(n=80) | P               | p<br>Control vs.<br>NHA* | p<br>Control vs.<br>HA* | p<br>NHA vs<br>HA* |
|--------------------------|---------------------|-------------------------|--------------------|-----------------|--------------------------|-------------------------|--------------------|
| Age (years)              | 26.97±4.19a         | 27.47±5.52ab            | 25.24±4.77         | <b>0.03</b>     |                          |                         |                    |
| aTL (Kbp)                | 15.19±8.19          | 12.91±10.63             | 20.89±13.03        | <b>&lt;0.01</b> | 0.66                     | <b>&lt;0.01</b>         | <b>0.04</b>        |
| BMI (kg/m <sup>2</sup> ) | 22.02±2.48a         | 32.52±7.31b             | 30.31±7.73b        | <b>0.001</b>    | <b>0.001</b>             | <b>0.001</b>            | 0.31               |
| Weigth (kg)              | 60.60±5.49a         | 77.91±20.31b            | 78.55±20.61b       | <b>0.001</b>    | <b>0.001</b>             | <b>0.001</b>            | 0.33               |
| WC (cm)                  | 74.77±8.47a         | 98.10±13.36b            | 92.50±17.38b       | <b>0.001</b>    | <b>0.001</b>             | <b>0.001</b>            | 0.19               |
| SBP (mmHg)               | 110 (110-120)       | 110 (110-130)           | 110 (110-130)      | 0.32            | 0.92                     | 0.09                    | 0.08               |
| DBP (mmHg)               | 70 (70-80)          | 70 (70-80)              | 70 (70-80)         | 0.38            | 0.25                     | 0.09                    | 0.35               |
| TC (mg/dL)               | 159.57±24.19a       | 201.50±45.84b           | 185.85±38.66b      | <b>0.03</b>     | <b>0.001</b>             | <b>0.001</b>            | 0.44               |
| HDL-C (mg/dL)            | 52.79±12.96         | 52.45±15.51             | 51.16±13.57        | 0.60            | 0.65                     | 0.54                    | 0.83               |
| LDL-C (mg/dL)            | 88.60 (88.6-105.1)a | 135.50 (135.50-166.25)b | 105.50 (107-137)b  | <b>0.001</b>    | <b>0.001</b>             | <b>0.001</b>            | <b>0.05</b>        |
| TG (mg/dL)               | 61±28.33a           | 123.69±54.07b           | 107.54± 54.33b     | <b>0.001</b>    | <b>0.001</b>             | <b>0.001</b>            | 0.11               |
| Glucose (mg/dL)          | 82.14±8.66a         | 92.92±12.01b            | 89.85±12.15b       | <b>0.001</b>    | <b>0.001</b>             | <b>0.001</b>            | 0.12               |
| Insulin (mg/dL)          | 7.61(7.61-11.12)a   | 13.80 (13.80-15.90)b    | 12.95 (13-21)b     | <b>0.001</b>    | <b>0.001</b>             | <b>0.001</b>            | 0.89               |
| HOMA-IR                  | 1.64 (1.64-2.35)a   | 2.95(2.95-4.11)b        | 2.73(2.75-4.78)b   | <b>0.001</b>    | <b>0.001</b>             | <b>0.001</b>            | 0.73               |
| QUICKI                   | 0.36±0.03a          | 0.32±0.04b              | 0.33±0.03b         | <b>0.001</b>    | <b>0.001</b>             | <b>0.001</b>            | 0.65               |

Values are expressed as mean ± SD (ANOVA and post-hoc Bonferroni) or Median and 25-75 interquartile range (Kruskall Wallis Test). NHA-PCOS: Non hyperandrogenic PCOS phenotype, HA-PCOS: Hyperandrogenic PCOS phenotype, BMI: Body mass index, WC: waist circumference, SBP: Systolic blood pressure, DBP: Diastolic blood pressure, TC: Total cholesterol, HDL-C: High density cholesterol, LDL-C: Low density cholesterol, TG: Triglycerides, HOMA-IR: Homeostasis model assessment of insulin resistance, QUICKY: Quantitative Insulin Sensitivity Check Index. Different letters a and b express statistical difference between groups in univariate analysis. P<0.05 was considered as significant. p value\* adjusted by age (ANCOVA) for control vs. PCOS phenotypes and between PCOS subphenotypes.

**Supplementary Table 2.** Clinical and biochemical parameters of the control and PCOS groups divided by obesity condition.

| Features                 | Control<br>(n=64) | noOB-PCOS<br>(n=72)      | OB-PCOS<br>(n=78)     | P                | p<br>Control vs<br>noOB* | p<br>Control vs<br>OB * | p<br>noOB vs<br>OB* |
|--------------------------|-------------------|--------------------------|-----------------------|------------------|--------------------------|-------------------------|---------------------|
| Age (years)              | 26.97±4.19        | 25.00 (22.00-30.00)      | 25.50 (23.00-30.00)   | 0.133            |                          |                         |                     |
| aTL (Kpb)                | 14.5±8.3a         | 20.7±12.9b               | 17.4±11.3ab           | <b>0.008</b>     | <b>0.001</b>             | 0.354                   | 0.110               |
| BMI (kg/m <sup>2</sup> ) | 22.02±2.48a       | 24.68±3.20b              | 37.43±5.51c           | <b>&lt;0.001</b> | <b>&lt;0.001</b>         | <b>&lt;0.001</b>        | <b>&lt;0.001</b>    |
| Weigth (kg)              | 60.2±5.49a        | 62.7±10.27a              | 92.30 (83.60-103.00)b | <b>&lt;0.001</b> | 0.624                    | <b>&lt;0.001</b>        | <b>&lt;0.001</b>    |
| WC (cm)                  | 74.77±8.47a       | 82.1±10.32b              | 107.18±11.91c         | <b>&lt;0.001</b> | <b>&lt;0.001</b>         | <b>&lt;0.001</b>        | <b>&lt;0.001</b>    |
| SBP (mmHg)               | 115 (110-120)a    | 102 (90-120)b            | 110 (100-130)a        | <b>0.046</b>     | <b>0.008</b>             | 0.407                   | <b>&lt;0.001</b>    |
| DBP (mmHg)               | 70 (70-80)        | 70 (60-80)               | 70 (70-80)            | <b>0.009</b>     | <b>0.004</b>             | 0.676                   | <b>0.007</b>        |
| TC (mg/dL)               | 158.79±23.57a     | 183.50±39.17b            | 187 (163.25-219.75)b  | <b>&lt;0.001</b> | <b>&lt;0.001</b>         | <b>&lt;0.001</b>        | 0.892               |
| HDL-C(mg/dL)             | 52 (44-57)a       | 56.15±15.31 <sup>a</sup> | 44 (38-51)b           | <b>&lt;0.001</b> | 0.478                    | <b>0.004</b>            | <b>&lt;0.001</b>    |
| LDL-C                    | 91.85±21.88a      | 103.50 (88.25-132.75)b   | 120.21±30.82c         | <b>&lt;0.001</b> | <b>0.003</b>             | <b>&lt;0.001</b>        | 0.152               |
| TG (mg/dL)               | 60 (49-94)a       | 97.00 (66.75-140.75)b    | 123 (93-176)c         | <b>&lt;0.001</b> | <b>&lt;0.001</b>         | <b>&lt;0.001</b>        | <b>0.011</b>        |
| Glucose                  | 81.90±8.41a       | 86 (81-94)b              | 91.81±12.48c          | <b>&lt;0.001</b> | <b>0.003</b>             | <b>&lt;0.001</b>        | 0.107               |
| Insulin (mg/dL)          | 8.56±4.08a        | 10.60 (5.55-13.30)b      | 19.00 (13.85-25.78)c  | <b>&lt;0.001</b> | 0.134                    | <b>&lt;0.001</b>        | <b>&lt;0.001</b>    |
| HOMA-IR                  | 1,75±0.87a        | 2.20 (1.18-3.02)b        | 4.34 (3.04-5.75)c     | <b>&lt;0.001</b> | 0.409                    | <b>&lt;0.001</b>        | <b>&lt;0.001</b>    |
| QUICKI                   | 0.36 (0.34-0.38)a | 0.34 (0.32-0.37)b        | 0.31 (0.29-0.32)c     | <b>&lt;0.001</b> | 0.123                    | <b>&lt;0.001</b>        | <b>&lt;0.001</b>    |

Values are expressed as mean ± SD (ANOVA and post-hoc Bonferroni). Median and 25-75 interquartile range (Kruskall Wallis Test). P value: univariate analysis. Different letters a, b and c express statistical difference between groups in univariate analysis., noOB-PCOS: non obese PCOS women, OB-PCOS: Obese PCOS, aTL: Absolute telomere length, BMI: Body mass index, WC: waist circumference, SBP: Systolic blood pressure, DBP: Diastolic blood pressure, TC: Total cholesterol, HDL-C: High density cholesterol, LDL-C: Low density cholesterol, TG: Triglycerides, HOMA-IR: Homeostasis model assessment of insulin resistance, QUICKY: Quantitative Insulin Sensitivity Check Index. P<0.05 was considered as significant. p value\* adjusted by age (ANCOVA) for control vs. PCOS with and without obesity and intra PCOS.

**Supplementary Table 3.** Clinical and biochemical parameters of the control and PCOS groups divided by metabolic condition.

| Features                 | Control<br>(n=64) | MH-PCOS<br>(n=64)    | MetS-PCOS<br>(n=20) | P                | p<br>Control vs.<br>MH* | p<br>Control vs.<br>MetS* | p<br>MH vs<br>MetS* |
|--------------------------|-------------------|----------------------|---------------------|------------------|-------------------------|---------------------------|---------------------|
| Age (years)              | 26.77±4.36a       | 23.00 (21.00-29.75)b | 29 (23-31)a         | <b>0.007</b>     |                         |                           |                     |
| aTL (Kpb)                | 14.32±8.03a       | 15.96 (9.68-26.94)b  | 18.82±10.38ab       | 0.07             | <b>0.008</b>            | 0.151                     | 0.442               |
| BMI (kg/m <sup>2</sup> ) | 22.11±2.56a       | 28.20 (22.97-34.71)b | 34.20±5.49c         | <b>&lt;0.001</b> | <b>&lt;0.001</b>        | <b>&lt;0.001</b>          | <b>0.028</b>        |
| Weigth (kg)              | 60.40±5.76a       | 71.00 (58.55-88.00)b | 90.30±15.67c        | <b>&lt;0.001</b> | <b>&lt;0.001</b>        | <b>&lt;0.001</b>          | <b>0.005</b>        |
| WC (cm)                  | 73.69±7.52a       | 90.19±16.79b         | 104.87±11.29c       | <b>&lt;0.001</b> | <b>&lt;0.001</b>        | <b>&lt;0.001</b>          | <b>0.003</b>        |
| SBP (mmHg)               | 115 (110-120)     | 107.5 (90.0-120.0)   | 117.35±21.22        | 0.082            | <b>0.023</b>            | 0.329                     | 0.052               |
| DBP (mmHg)               | 70 (70-80)        | 70 (60-80)           | 70 (70-80)          | 0.458            | <b>0.017</b>            | 0.847                     | 0.196               |
| TC (mg/dL)               | 159.89±24.52a     | 183.18±39.20b        | 204.63±40.92c       | <b>&lt;0.001</b> | <b>&lt;0.001</b>        | <b>&lt;0.001</b>          | <b>0.012</b>        |
| HDL-C(mg/dL)             | 52 (44-57)a       | 53.75±12.67a         | 43.26±10.52b        | <b>0.002</b>     | 0.597                   | <b>0.002</b>              | <b>0.003</b>        |
| LDL-C (mg/dL)            | 91.91±22.06a      | 102.0 (89.0-137.5)b  | 131.30±31.82c       | <b>&lt;0.001</b> | <b>0.001</b>            | <b>&lt;0.001</b>          | <b>0.016</b>        |
| TG (mg/dL)               | 60.0 (48.5-84.5)a | 87.75±30.29b         | 173.95±59.24c       | <b>&lt;0.001</b> | <b>0.001</b>            | <b>&lt;0.001</b>          | <b>&lt;0.001</b>    |
| Glucose (mg/dL)          | 81.85±8.78a       | 87.00 (81.22-93.00)b | 98.70±11.29c        | <b>&lt;0.001</b> | <b>0.002</b>            | <b>&lt;0.001</b>          | <b>&lt;0.001</b>    |
| Insulin (mg/dL)          | 8.92±4.37a        | 11.35 (7.90-18.84)b  | 19.05±9.16c         | <b>&lt;0.001</b> | <b>&lt;0.001</b>        | <b>&lt;0.001</b>          | 0.076               |
| HOMA-IR                  | 1.73 (1.09-2.43)a | 2.39 (1.43-4.36)b    | 4.57±2.30c          | <b>&lt;0.001</b> | <b>0.001</b>            | <b>&lt;0.001</b>          | <b>0.02</b>         |
| QUICKI                   | 0.35 (0.33-0.38)a | 0.34 (0.31-0.36)b    | 0.30 (0.30-0.32)c   | <b>0.003</b>     | <b>0.005</b>            | <b>&lt;0.001</b>          | <b>0.026</b>        |

Values are expressed as mean ± SD (ANOVA and post-hoc Bonferroni). Median and 25-75 interquartile range (Kruskall Wallis Test). P value: univariate analysis. Different letters a, b and c express statistical difference between groups in univariate analysis. MH-PCOS: Metabolically Healthy PCOS, MetS-PCOS: PCOS with Metabolic Syndrome, aTL: Absolute telomere length, BMI: Body mass index, WC: waist circumference, SBP: Systolic blood pressure, DBP: Diastolic blood pressure, TC: Total cholesterol, HDL-C: High density cholesterol, LDL-C: Low density cholesterol, TG: Triglycerides, HOMA-IR: Homeostasis model assessment of insulin resistance, QUICKY: Quantitative Insulin Sensitivity Check Index. P<0.05 was considered as significant

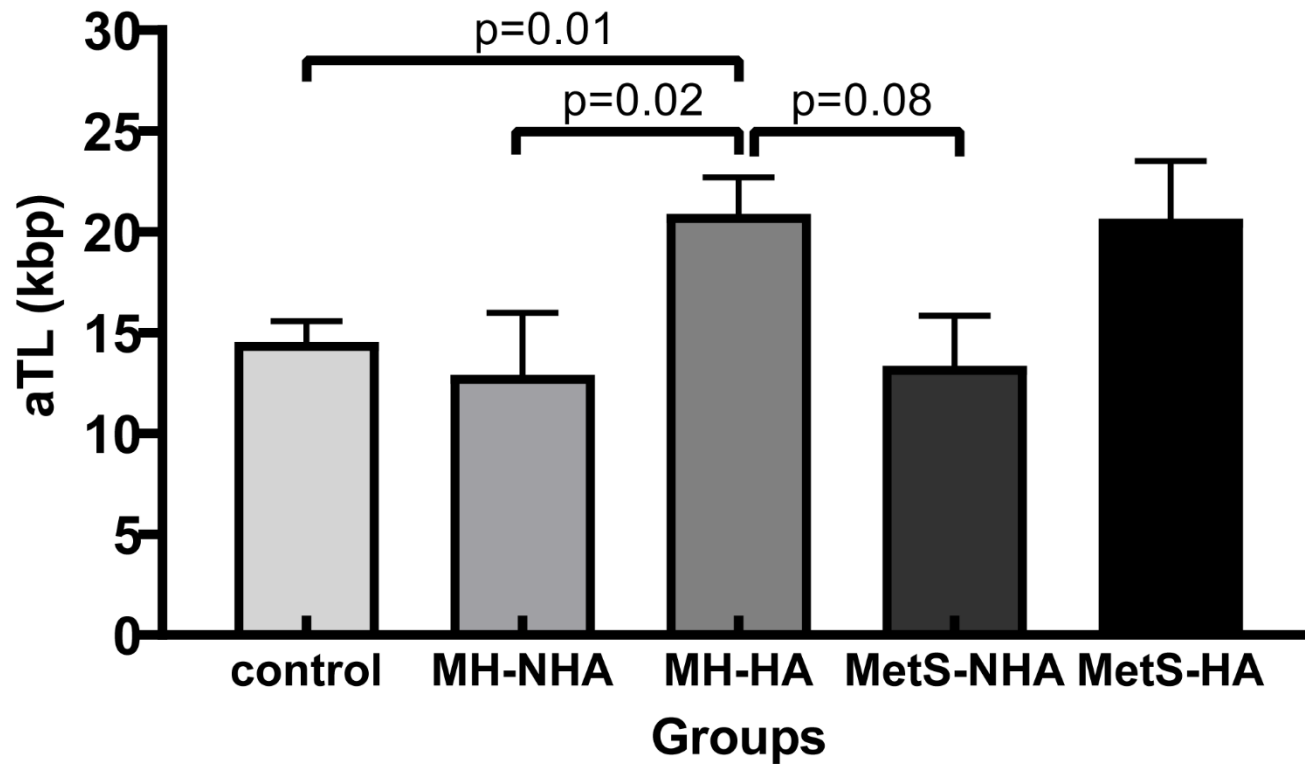

**Supplementary Figure 1. Comparisons of aTL between control group and PCOS phenotypes HA and NHA with and without MetS.** Values are presented as mean aTL and standard errors. aTL: Absolute telomere length. Kbp: kilobase pairs. MetS: Metabolic syndrome, MH-NHA: non hyperandrogenic and metabolically healthy PCOS women, MH-HA: Hyperandrogenic and metabolically healthy PCOS women; MetS-NHA: non hyperandrogenic PCOS with MetS; MetS-HA: Hyperandrogenic PCOS with MetS. Univariate analysis adjusted by age (ANCOVA).  $p < 0.05$  was considered as significant.
